# Supplementary material for: The human brain connectome weighted by the myelin content and total intra-axonal cross-sectional area of white matter tracts
Source: PubMed Central journal article supplement (PMC10697181; doi:10.1162/netn_a_00330), 2023-12-22
Supplement: netn-7-4-1363-s001.pdf [file netn-7-4-1363-s001.pdf]

## 1 SUPPLEMENTARY INFORMATION

2

### 3 **The Human Brain Connectome Weighted by the Myelin Content** 4 **and Total Intra-Axonal Cross-Sectional Area of White Matter** 5 **Tracts**

6

7 Mark C. Nelson<sup>1,2</sup>, Jessica Royer<sup>1,2</sup>, Wen Da Lu<sup>2,3</sup>, Ilana R. Leppert<sup>2</sup>, Jennifer S.W. Campbell<sup>2</sup>,  
8 Simona Schiavi<sup>4</sup>, Hyerang Jin<sup>1,2</sup>, Shahin Tavakol<sup>1,2</sup>, Reinder Vos de Wael<sup>1,2</sup>, Raul Rodriguez-  
9 Cruces<sup>1,2</sup>, G. Bruce Pike<sup>5</sup>, Boris C. Bernhardt<sup>1,2</sup>, Alessandro Daducci<sup>4</sup>, Bratislav Mistic<sup>1,2</sup>, and  
10 Christine L. Tardif<sup>1,2,3</sup>

11 *<sup>1</sup>Department of Neurology and Neurosurgery, McGill university, Montreal, QC, Canada. <sup>2</sup>McConnell Brain Imaging Centre, Montreal*  
12 *Neurological Institute and Hospital, Montreal, QC, Canada. <sup>3</sup>Department of Biomedical Engineering, McGill University, Montreal, QC, Canada.*  
13 *<sup>4</sup>Department of Computer Science, University of Verona, Verona, Italy. <sup>5</sup>Hotchkiss Brain Institute and Departments of Radiology and Clinical*  
14 *Neuroscience, University of Calgary, Calgary, Canada.*

15

16 Corresponding Author: Mark C Nelson, [mark.nelson3@mail.mcgill.ca](mailto:mark.nelson3@mail.mcgill.ca)

17

#### 18 ***Robustness of Results across Parcellation Resolutions***

19 We replicated all primary analyses across a wide range of resolutions of the Schaefer cortical  
20 parcellation. When correlating edge-length-regressed residuals with FC across the 200-, 400- and  
21 600-node Schaefer atlas (**Figure S1A**), the negative correlation with  $R_1$  and positive correlation  
22 with NoS, SIFT2 and COMMIT are all robust. Correlation magnitude tends to increase with

23 parcellation granularity. This trend is reversed in the very-high resolution Schaefer-900 (**Figure**  
 24 **S1B**).

25

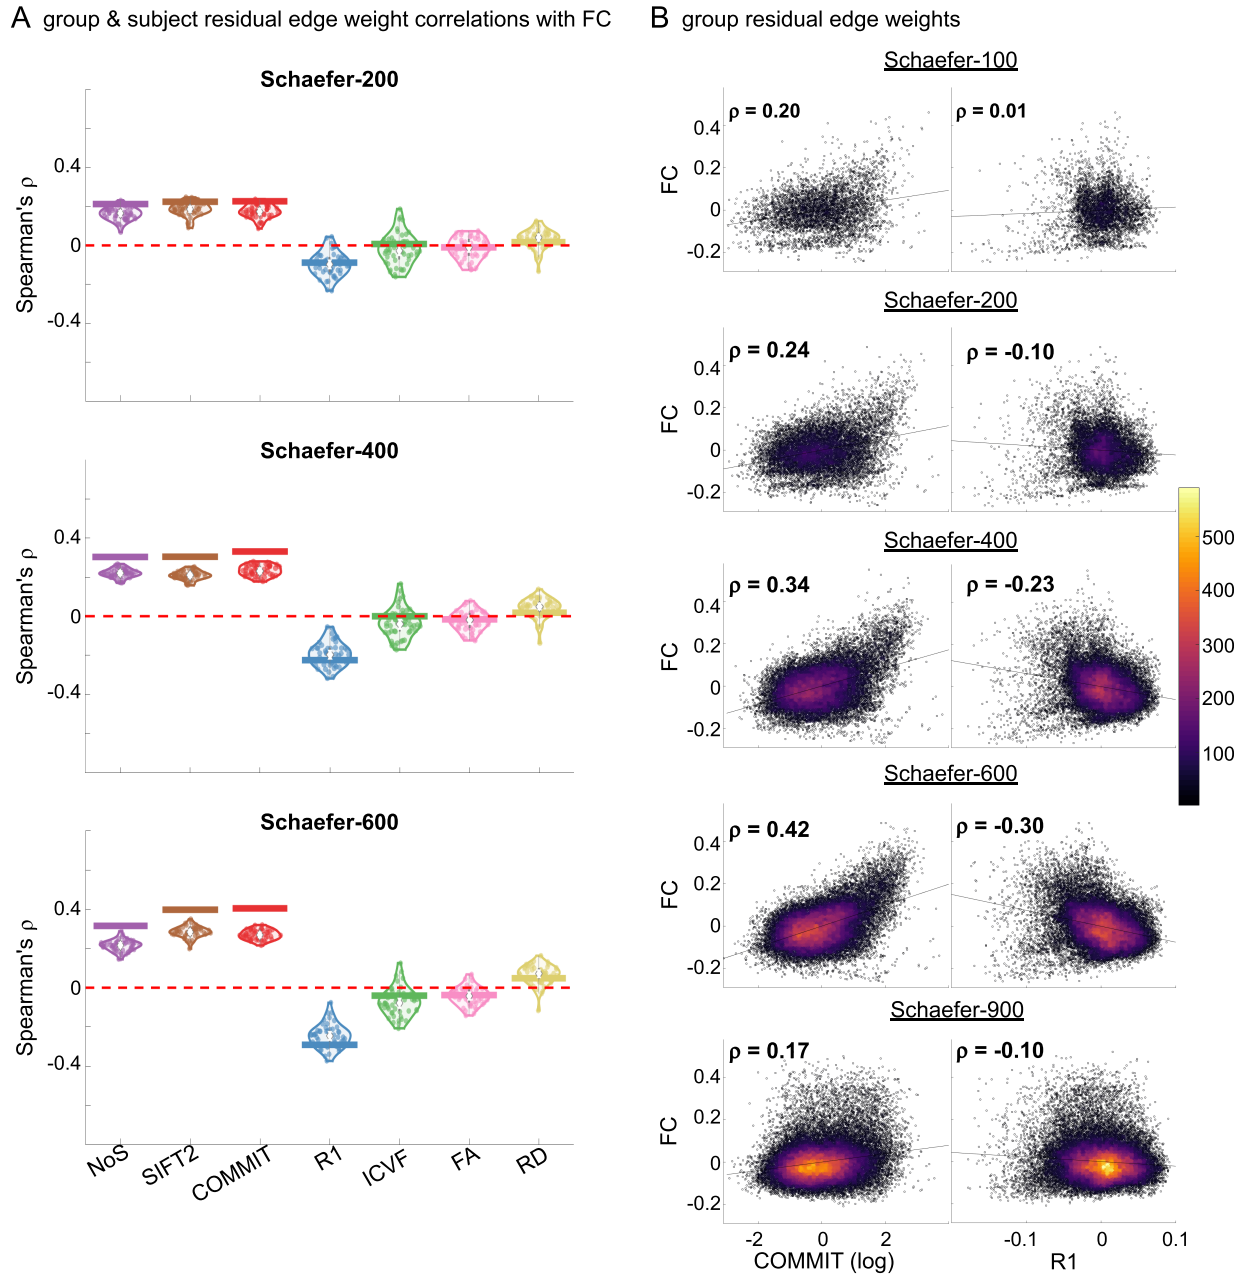

26

27 **Figure S1.** Residual Edge Weight Correlations with FC across Parcellation Resolution. (A) Violin  
 28 distributions of edgewise Spearman's rank correlations of residual edge weights in all networks with  
 29 residual edge weights in FC. Nodes are defined by the 200, 400 and 600 cortical node Schaefer

30 *parcellation. Residual edge weights were computed by linear regression of edge length. Colored data*  
31 *points and bars respectively indicate subject-level and group-level correlations. (B) Heat scatter plots of*  
32 *group-level residual edge weights from FC as a function of COMMIT (left) and  $R_1$  (right) across the 100,*  
33 *200, 400, 600 and 900 node Schaefer cortical parcellation. Spearman's rank correlations are reported*  
34 *( $\rho$ ), and the best fit linear curve is shown in black. Color indicates data density. All networks additionally*  
35 *include 14 subcortical regions.*

36

37 When correlating edge-length-regressed residuals with  $R_1$  across the 100, 200, 400, 600 and 900  
38 node Schaefer atlas (**Figure S2A**), the negative correlation with NoS, SIFT2, COMMIT and  
39 ICVF are all robust. Interestingly, while correlation magnitude tends to increase with parcellation  
40 granularity in the streamline-specific networks, it follows the reverse trend for ICVF. Scatter  
41 plots for these data are also shown (**Figure S2B**). The inverse relationship between  $R_1$  and  
42 COMMIT is found to be driven by the shortest network edges in the Schaefer-200 (**Figure S2C**)  
43 similarly to the result reported in the Schaefer-400.

44

A group residual edge weight correlations with R1

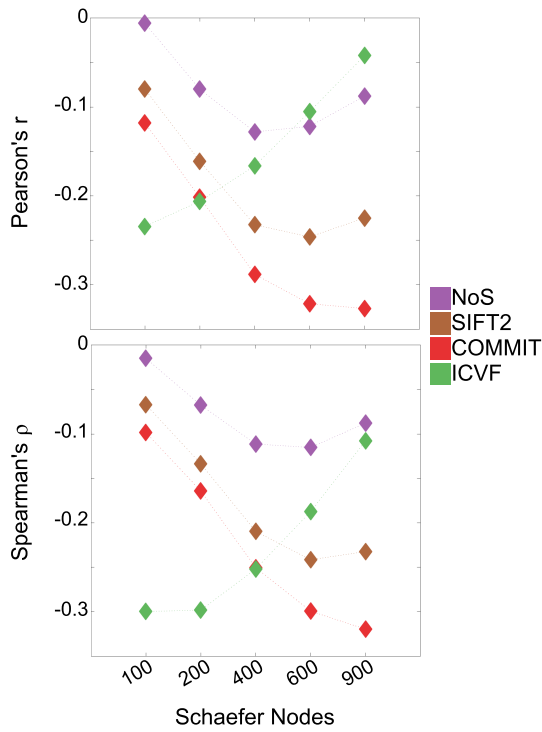

B group residual edge weights

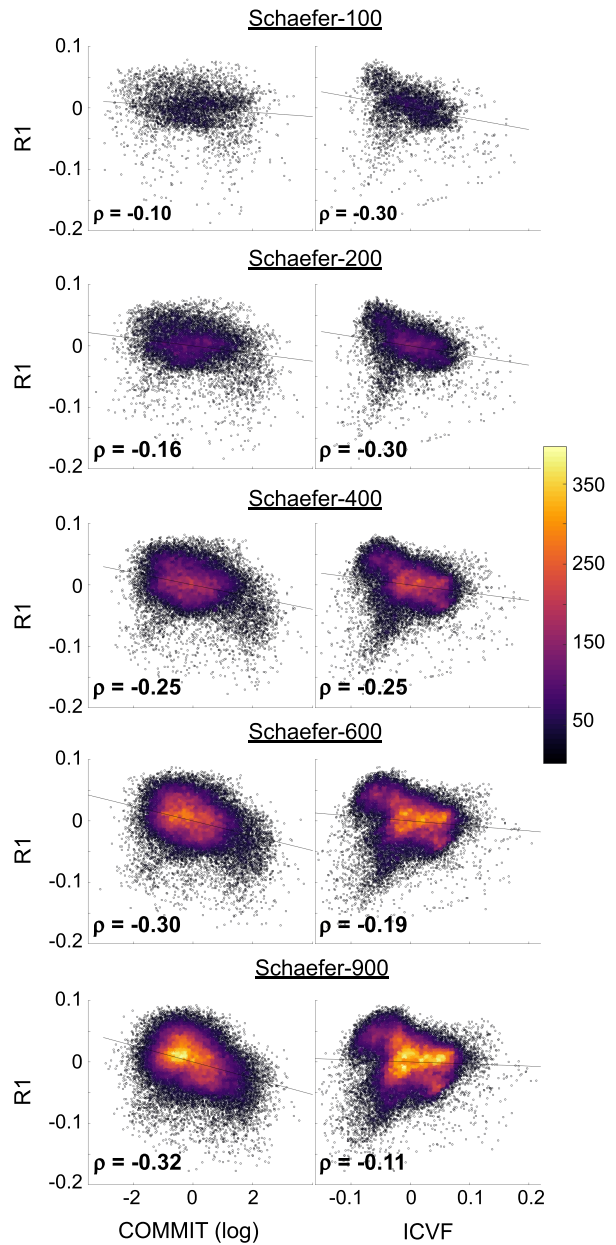

C edge weight correlations across edge length bins

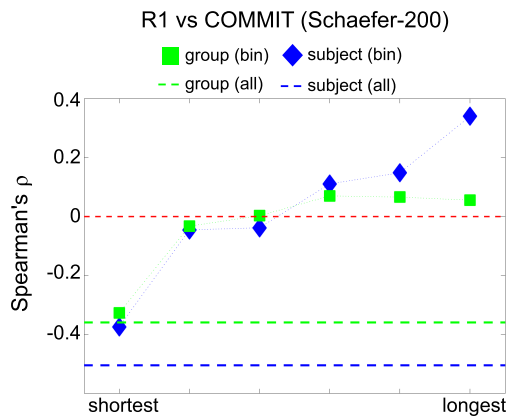

45

46 **Figure S2.** Residual Edge Weight Correlations with  $R_1$  across Parcellation Resolution. (A) Group-level

47 edgewise Pearson's  $r$  (top) and Spearman's  $\rho$  (bottom) of edge-length-regressed-residual edge weights

48 from  $R_1$  with NoS, SIFT2, COMMIT and ICVF across the 100, 200, 400, 600 and 900 node Schaefer

49 parcellation. (B) Heat scatter plots of group-level residual edge weights from  $R_1$  as a function of

50 COMMIT (left) and ICVF (right) across the 100, 200, 400, 600 and 900 node Schaefer parcellation.

51 Spearman's rank correlations are reported ( $\rho$ ), and the best fit linear curve is shown in black. Color

52 *indicates data density. (C) Edgewise Spearman's rank correlation of edge weights in  $R_1$  vs COMMIT*  
53 *across edge length bins for the Schaefer-200. Group-level and subject-level are respectively shown in*  
54 *green and blue. The square and diamond markers connected by dotted lines show binned correlation*  
55 *values, and the horizontal dashed green and blue lines mark the correlation values for all edges pooled*  
56 *together. All networks additionally include 14 subcortical regions.*

57

58 When replicating the graph theory analysis for group-level networks in the Schaefer-200 and -  
59 600 parcellation (**Figure S3**), all weighted structural networks display normalized small-  
60 worldness. Once again, this feature is higher in magnitude for COMMIT, SIFT2 and NoS  
61 relative to the tractometry networks, which are essentially indiscernible. Small-worldness  
62 increases with parcellation granularity in all structural networks. A weighted rich club is detected  
63 in COMMIT, SIFT2 and NoS, as well as the binary network over a large range of degree  $k$ . As in  
64 the main text, FA and  $R_1$  do not show a weighted rich-club topology for any degree  $k$ .

65

A group normalized small-worldness

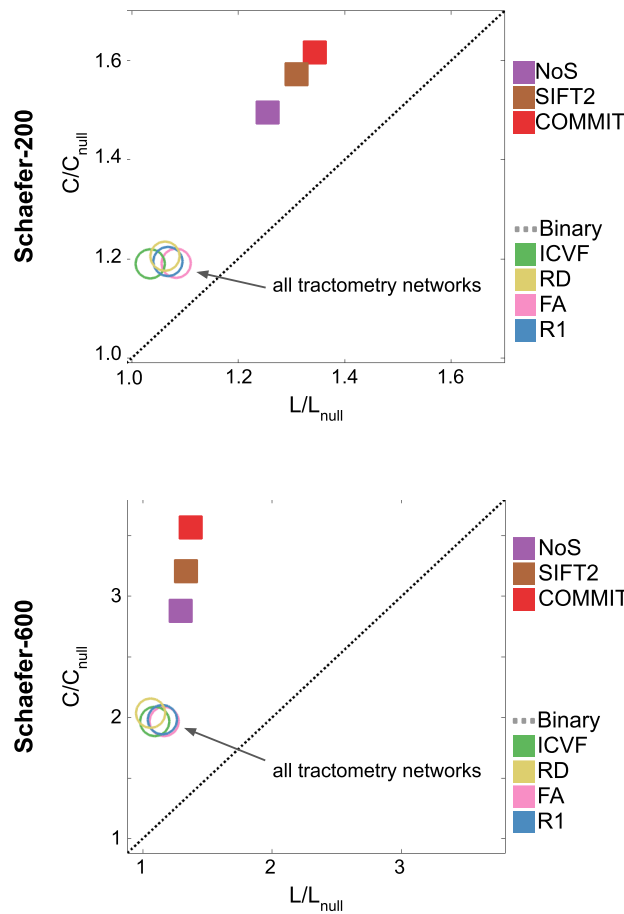

B group normalized rich club

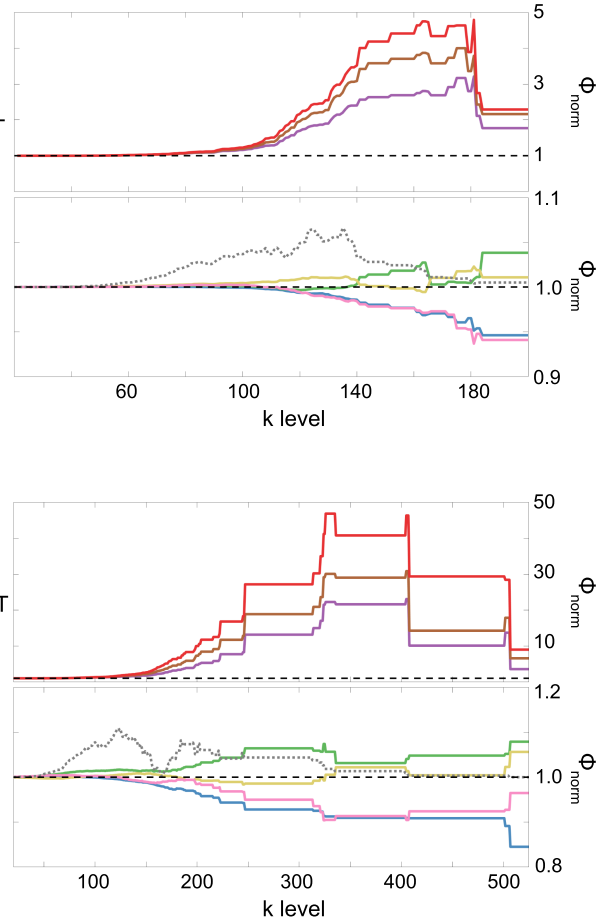

66

67 **Figure S3. Group-Level Network Topology across Parcellation Resolution.** (A) Small-worldness was  
 68 estimated in all structural networks: clustering coefficient was normalized within each node, averaged  
 69 across nodes ( $C/C_{null}$ ), then plot as a function of normalized characteristic path length ( $L/L_{null}$ ). Topology  
 70 measures averaged across 50 degree and strength preserving null networks were used for normalization.  
 71 Networks above the identity line (dotted black) are characterized by the small world attribute.  
 72 Tractometry networks are indicated by the arrow. (B) Normalized rich club curves are shown for  
 73 COMMIT, NoS and SIFT2 (top), as well as ICVF, RD, FA and  $R_1$  (bottom). A single binary network  
 74 (dotted gray line) is also shown (bottom) as binary connectivity was uniform across weighted networks.  
 75 The normalized rich-club coefficient ( $\phi_{norm}$ ) was computed across the range of degree ( $k$ ) and normalized  
 76 against 1000 null networks (degree preserving for binary and degree and strength preserving for

77 *weighted networks). A  $\phi_{norm}$  value  $> 1$  (horizontal dashed black lines) over a range of  $k$  indicates the*  
78 *presence of a rich club. Analyses were replicated in the 200 (top) and 600 (bottom) node Schaefer*  
79 *parcellation. All networks additionally include 14 subcortical regions.*

80

81 Normalized hubness (**Figure S4**) is observed to change for each weighted structural network  
82 across the 200, 400 and 600 node Schaefer parcellations. We suspect that it may be due in part  
83 to the inclusion of 14 subcortical ROIs, which remain static in granularity. Thus, the subcortical  
84 nodes become increasingly more densely connected with respect to the cortex as the granularity  
85 of the cortical parcellation is increased.

86

Group Normalized Hubness

Schaefer-200

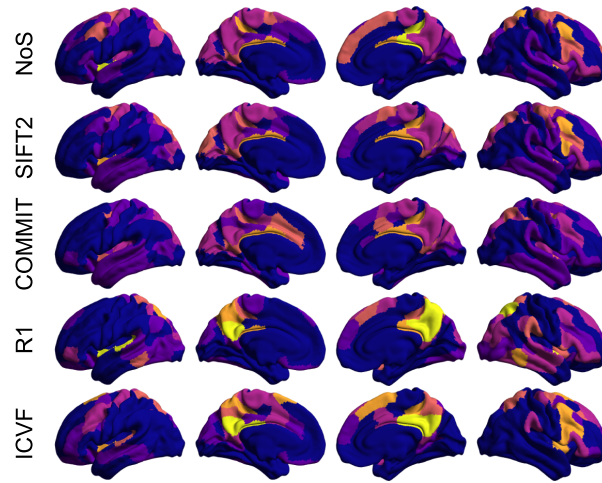

Schaefer-400

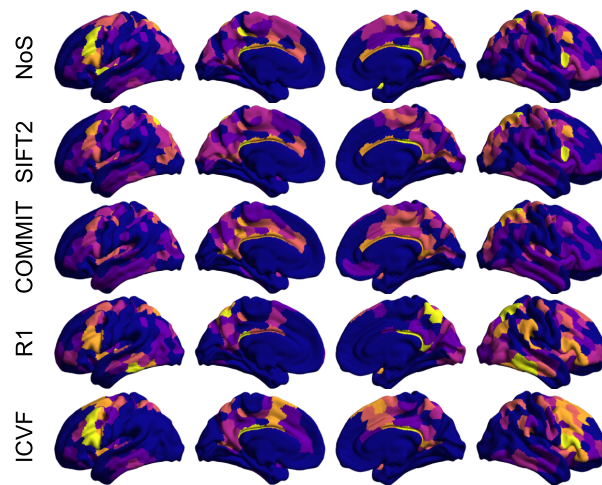

Schaefer-600

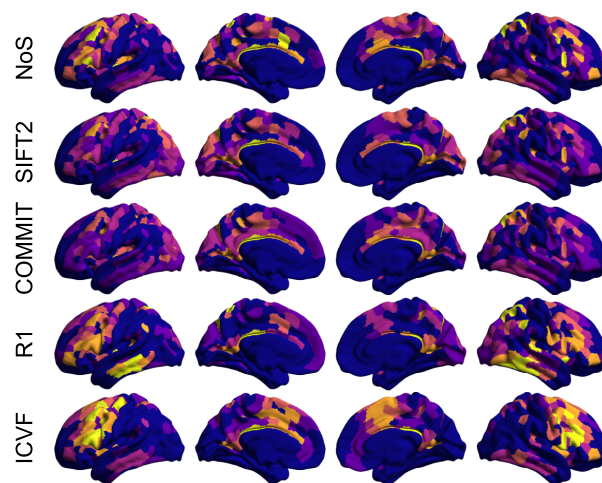



88 **Figure S4.** *Group-Level Normalized Hubness across Parcellation Resolution. Nodewise hubness scores*  
89 *are projected onto the 200, 400 and 600 node Schaefer cortical parcellation plus 14 subcortical regions*  
90 *(not shown). Scores (0-5) were computed for each node as +1 point for all nodes in top 20% strength,*  
91 *betweenness, closeness and eigenvector centrality, as well as bottom 20% clustering coefficient.*

92

93

#### 94 **Replication in a Second Dataset**

95 All primary analyses were successfully replicated (**Figure S5-S6**) in a second multimodal MRI  
96 dataset acquired at a lower resolution and comprising 20 healthy volunteers scanned at 3 Tesla  
97 on a Siemens Magnetom Prisma-Fit scanner equipped with a 64-channel head coil including:

- 98 • Multi-shell diffusion-weighted imaging (DWI): 2D pulsed gradient spin-echo echo-planar  
99 imaging sequence consisting of shells with b-values 0, 300, 1000, and 2000s/mm<sup>2</sup> in 6,  
100 10, 30, and 64 diffusion directions, respectively (2.6mm isotropic; TR = 3000ms, TE =  
101 57ms; multi-band factor = 3). b0 images were also acquired with reverse phase encoding  
102 direction to facilitate distortion correction of DWI data.
- 103 • Quantitative T<sub>1</sub> relaxometry data was acquired with a sparse 3D-MP2RAGE sequence  
104 (Marques et al., 2010) (1mm isotropic; TR = 5000ms, TE = 2.7ms, TI<sub>1</sub> = 940ms, T<sub>12</sub> =  
105 2830ms; partial Fourier = 6/8). This was used to compute a T<sub>1</sub> map which was sampled to  
106 estimate the edge weights in networks weighted by R<sub>1</sub> (myelin-weighted).

107

108 Preprocessing deviated in two important ways: (1) tractograms of only 1M streamlines were used  
109 (vs 5M in the main text), and (2) the edge weights in NoS-weighted networks were not scaled by  
110 the inverse of node volume. All other methods were identical.

A residual edge weight correlations

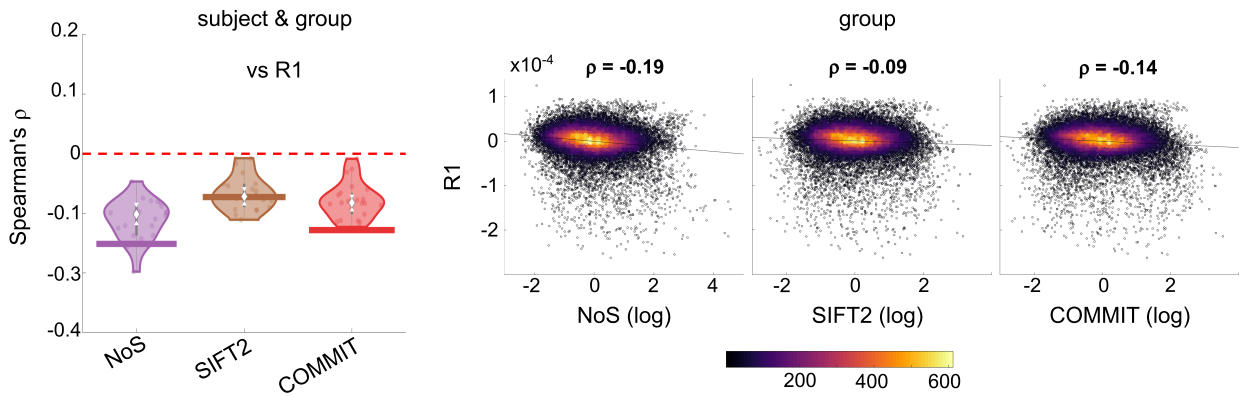

B edge weight correlations across edge length bins

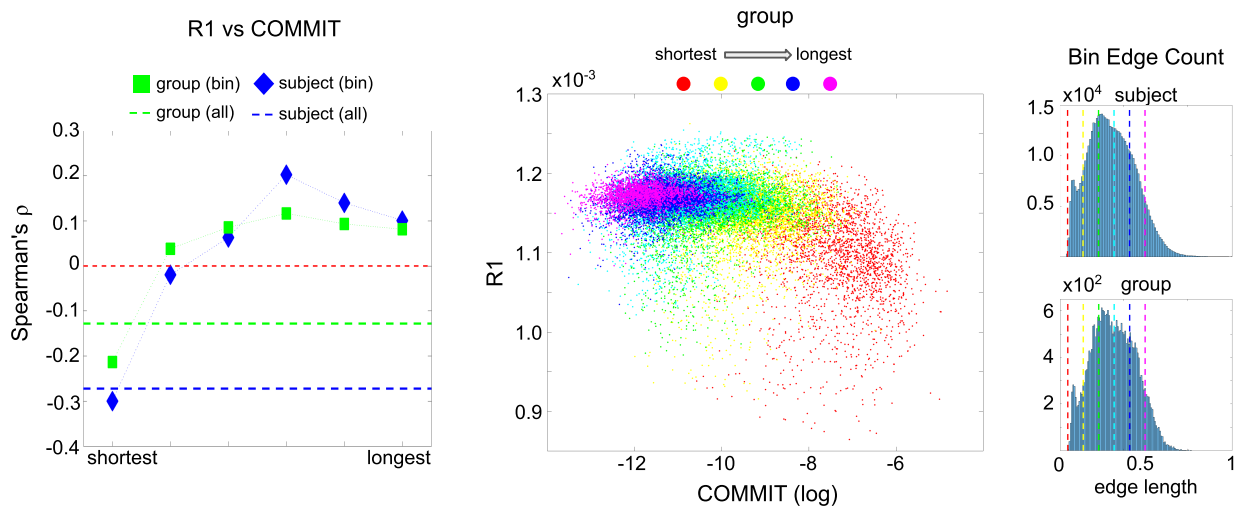

112

113 **Figure S5.** The Myelin-Dependence of Structural Brain Networks Replicated. (A) Violin distributions  
 114 (left) of edgewise Spearman's rank correlations with the myelin-weighted network  $R_1$ . Residual edge  
 115 weights are compared following linear regression of edge length. Colored data points and bars  
 116 respectively indicate subject-level and group-level correlations. Heat scatter plots (right) of group-level  
 117 residual edge weights in  $R_1$  as a function of NoS, SIFT2 and COMMIT. Spearman's rank correlations are  
 118 reported ( $\rho$ ), and the best fit linear curve is shown in black. Color indicates data density. (B) Line plot  
 119 (left) of edgewise Spearman's rank correlation of edge weights in  $R_1$  vs COMMIT across edge length  
 120 bins. Group-level and subject-level are respectively shown in green and blue. The square and diamond

121 *markers connected by dotted lines show binned correlation values, and the horizontal dashed green and*  
122 *blue lines mark the correlation values for all edges pooled together. Scatter plot (middle) of group-level*  
123 *edge weights in  $R_1$  as a function of COMMIT with data points colored by bin identity. Histograms (right)*  
124 *illustrating subject- and group-level edge length bins.*

125

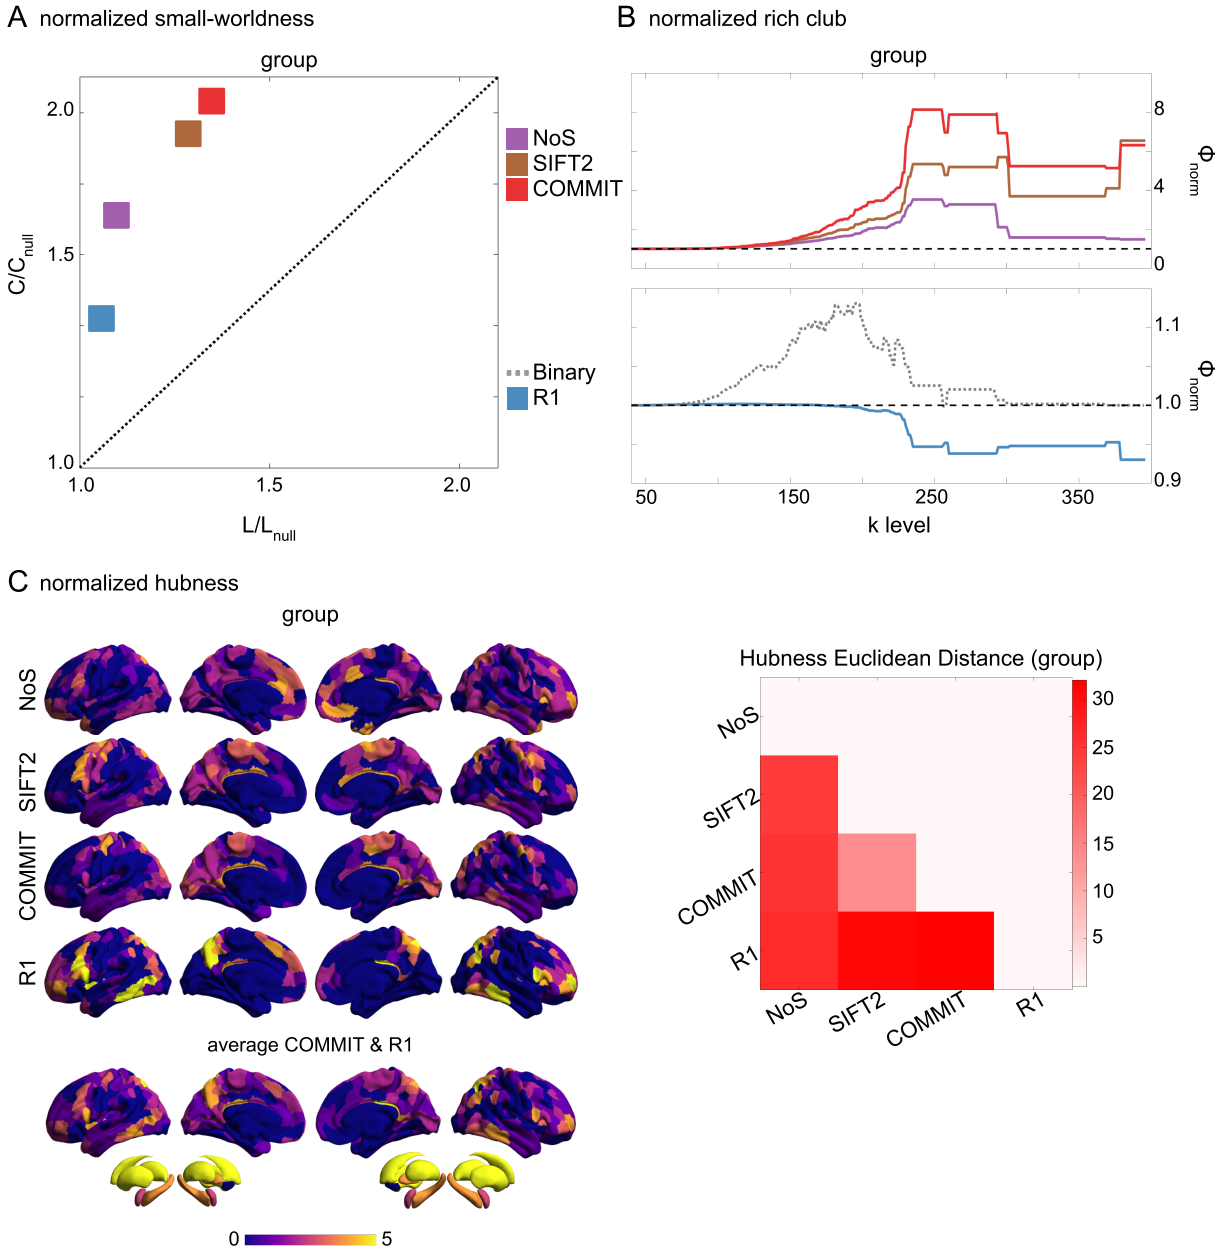

126

127 **Figure S6. Group-Level Network Topology Replicated.** (A) Small-worldness was estimated in all  
 128 structural networks: clustering coefficient was normalized within each node, averaged across nodes  
 129 ( $C/C_{null}$ ), then plot as a function of normalized characteristic path length ( $L/L_{null}$ ). Topology measures  
 130 averaged across 50 degree and strength preserving null networks were used for normalization. Networks  
 131 above the identity line (dotted black) are characterized by the small world attribute. (B) Normalized rich-  
 132 club curves are shown for COMMIT, NoS and SIFT2 (top), as well  $R_1$  (bottom). A single binary network

133 *(dotted gray line) is also shown (bottom) as binary connectivity was uniform across weighted networks.*  
134 *The normalized rich-club coefficient ( $\phi_{norm}$ ) was computed across the range of degree ( $k$ ) and normalized*  
135 *against 1000 null networks (degree preserving for binary and degree and strength preserving for*  
136 *weighted networks). A  $\phi_{norm}$  value  $> 1$  (horizontal dashed black lines) over a range of  $k$  indicates the*  
137 *presence of a rich club. (C) Nodewise hubness scores are projected onto Schaefer-400 cortical and 14-*  
138 *ROI subcortical surfaces. Scores (0-5) were computed for each node as +1 point for all nodes in top 20%*  
139 *strength, betweenness, closeness and eigenvector centrality, as well as bottom 20% clustering coefficient.*  
140 *The matrix (right) shows the Euclidean distance between all pairs of nodal hubness vectors.*

141

142

### 143 ***Permutation Testing***

144 We assessed the significance of edgewise correlations with FC (**Figure S7**) and  $R_1$  (**Figure S8**)  
145 by way of permutation testing. First, variance due to edge length was controlled for in all  
146 networks using linear regression. Edge weights in NoS, SIFT2 and COMMIT were log  
147 transformed to facilitate linear regression of edge length. Then, the residual edge weights in the  
148 network being correlated with either FC or  $R_1$  were shuffled, and a Spearman's rank correlation  
149 coefficient was computed. This process was repeated 1000 times for each network pair.  
150 Significance was quantified with a one-sided p-value ( $p_{perm}$ ) as the number of shuffled  
151 correlation coefficients equal in sign and greater in magnitude than the empirical value scaled by  
152 the number of permutation iterations. The correlation coefficients corresponding to all primary  
153 reported results with FC and  $R_1$  were significantly greater in magnitude than their corresponding  
154 null distributions: all had  $P_{perm}$  values  $\cong 0$ .

155

Group Permutation Testing  
Spearman's  $\rho$  with FC  
(edge-length regressed residuals)

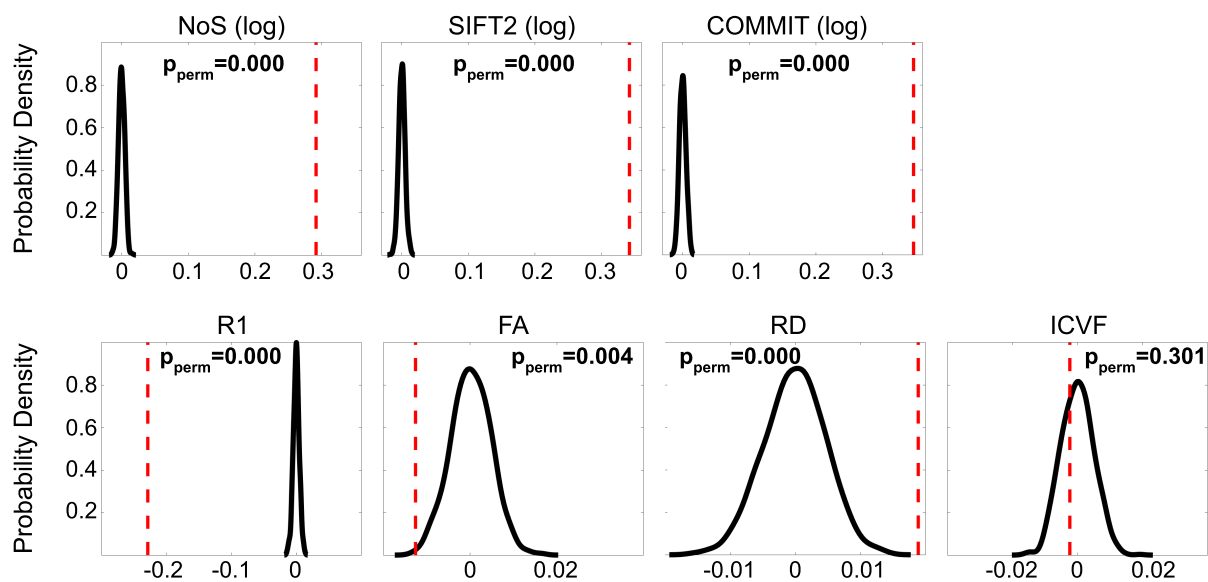

156

157 *Figure S7. Permutation Testing of Edgewise Residual Correlations with FC.*

158

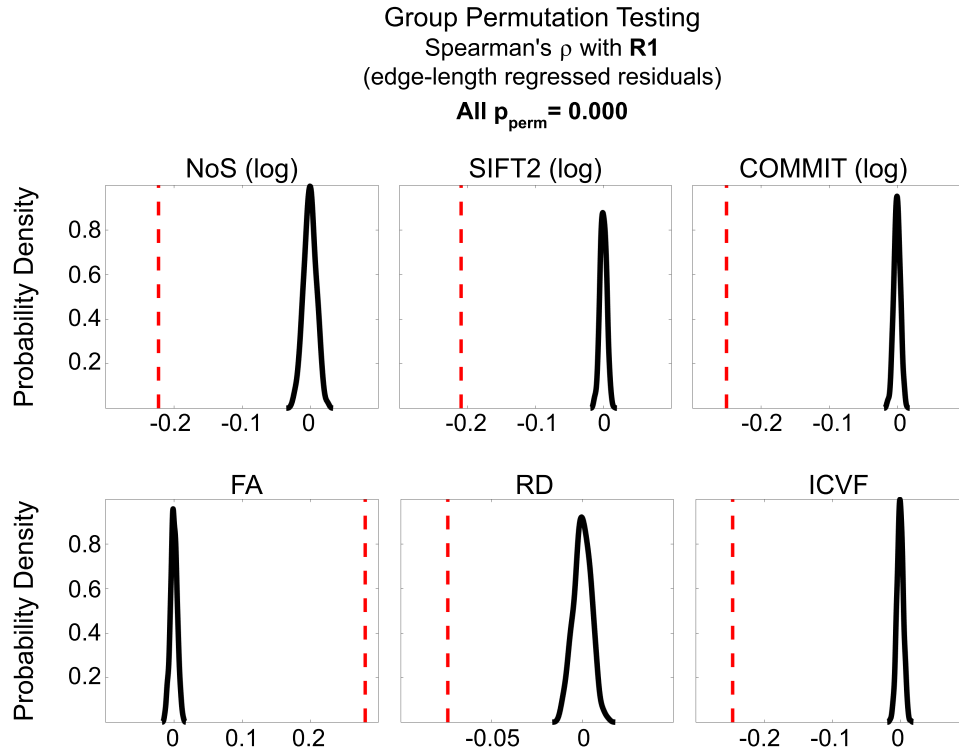

159

160 *Figure S8. Permutation Testing of Edgewise Residual Correlations with  $R_1$ .*

161

162

### 163 ***Intraclass Correlation***

164 To complement the CQD analysis of variance in the main manuscript, we assessed edge weight

165 variance by computing an intraclass correlation (ICC) coefficient within each weighted network

166 in the following manner. First, the edge weights in all networks were normalized to the range [0

167 1] by dividing by the subject-level maximum value within network. Then, subject-level

168 connectivity matrices were vectorized such that all lower triangle elements excluding the main

169 diagonal were stacked in an edge x subject matrix. Any edge = 0 for all subjects was removed

170 from this matrix. Then, in two variants of this analysis, these edge weights were either (1) not log

171 transformed, or (2)  $\log_{10}$  transformed if they were skewed (NoS, SIFT2 and COMMIT). In both

172 cases, an ICC coefficient was computed using a two-way random effects ANOVA (analysis of  
173 variance) model (**Figure S9**).

174

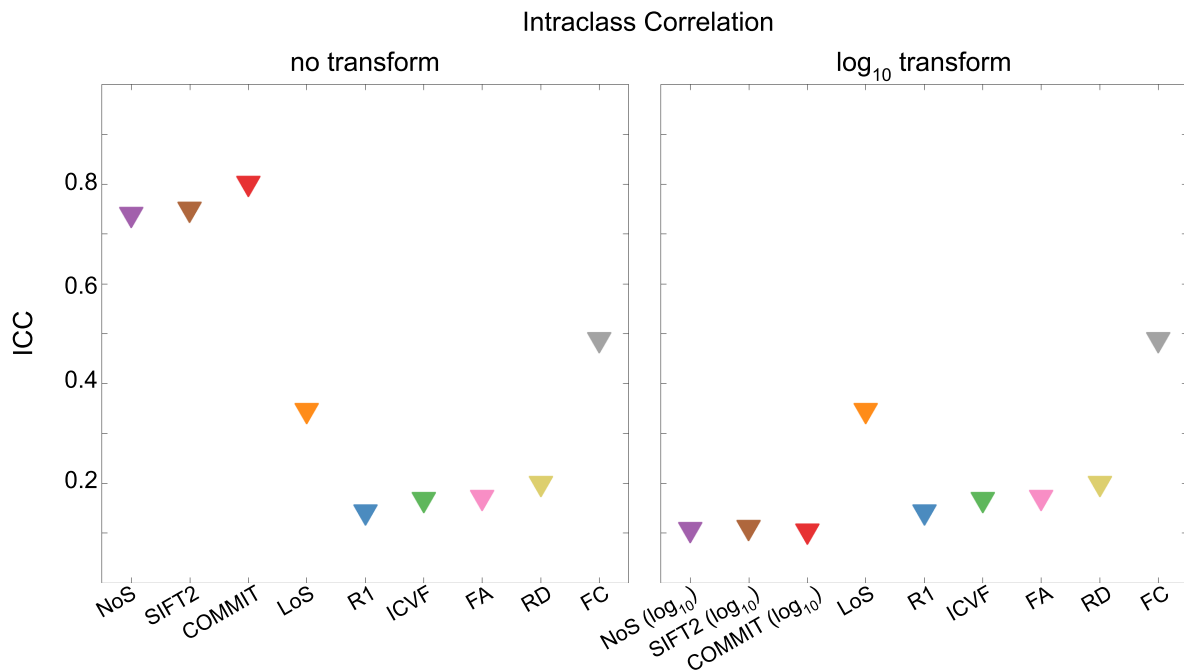

175

176 **Figure S9.** *Intra-class Correlation of Brain Networks.*

177

178 When edge weights remained untransformed, ICC was highest for COMMIT ( $r = 0.80$ ), SIFT2 ( $r$   
179  $= 0.75$ ) and NoS ( $r = 0.74$ ). However, log transformation of the edge weights in these networks  
180 decreased the magnitude of all of these coefficients to  $r \cong 0.10$ . All tractometry networks had  
181 ICC values ranging from 0.14 to 0.20. ICC for LoS and FC was 0.35 and 0.49, respectively. It is  
182 important to emphasize that the distribution of edge weights is a fundamental property of a brain  
183 network, and a transformation of this property yields a network with transformed features. Given  
184 that the ICC is sensitive to the distribution of the input data, in contrast to the CQD which is  
185 robust to outliers and skewed data, the comparability of ICC across structural brain networks  
186 with fundamentally different edge weight distributions remains unclear.



187

188

### 189 *COMMIT-Weighted Average Tractometry Does Not Alter SC Network Features*

190 In the main text, we have shown features of tractometry-derived SC networks which generally  
191 include lower within- and between-subject edge weight contrast, weaker correlations with FC  
192 and  $R_1$ , as well as lower magnitude small-worldness and rich-club coefficients relative to  
193 streamline-specific networks. We have suggested that these characteristics are likely to be due in  
194 part to the widespread partial voluming which occurs in the computation of edge weights using  
195 the tractometry method. In our main processing pipeline, we have taken measures to minimize  
196 the impact of this bias on the edge weights in our tractometry networks by eliminating all  
197 streamlines from the tractogram with a zero COMMIT weight (i.e.,  $< 1e^{-12}$ ). According to the  
198 COMMIT model, these streamlines do not contribute to the global diffusion signal and are thus  
199 interpreted as false positives.

200

201 The non-zero COMMIT streamline weights could be used to further reduce partial volume  
202 effects. Here, we compare in four subjects the tractometry edge weight computation approach  
203 described in the main text to a variant that uses the non-zero COMMIT streamline weights to  
204 compute a weighted average over streamlines for each node pair. For example, the edge weights  
205 in the FA-weighted network derived using the COMMIT-weighted-average method are  
206 computed as:

207

$$\alpha_{ij} = \frac{\sum_{k=1}^{N_{ij}} (x_{ij}^k * FA_{ij}^k)}{\sum_{k=1}^{N_{ij}} (x_{ij}^k)},$$

208 where  $\alpha_{ij}$  is the edge weight between nodes  $i$  and  $j$ ,  $N_{ij}$  is the number of streamlines, and  $FA_{ij}^k$   
209 and  $x_{ij}^k$  are the FA and COMMIT weights of streamline  $k$ . Importantly, streamlines with a  
210 COMMIT weight  $< 1e^{-12}$  are excluded by both methods. Therefore, these results are most  
211 accurately interpreted as a comparison of degrees of COMMIT-weighted tractometry.

212

213 Using this approach, we report that subject-level edge weight distributions appear qualitatively  
214 similar across the original (simple mean across streamlines) and COMMIT-weighted average  
215 tractometry methods (**Figure S10**). In addition, patterns of edgewise correlation with FC and  $R_1$   
216 (**Figure S11**), as well as small-worldness and rich-club curves are essentially identical. Thus, at  
217 this level of analysis, the COMMIT-weighted average tractometry approach (COMMIT-filtered  
218 tractogram  $\rightarrow$  COMMIT-weighted average) does not substantially alter the features of SC  
219 networks relative to the tractometry approach (COMMIT-filtered tractogram  $\rightarrow$  simple mean)  
220 implemented in the main manuscript.

221

### Subject Edge Weight Distributions

original COMMIT-weighted

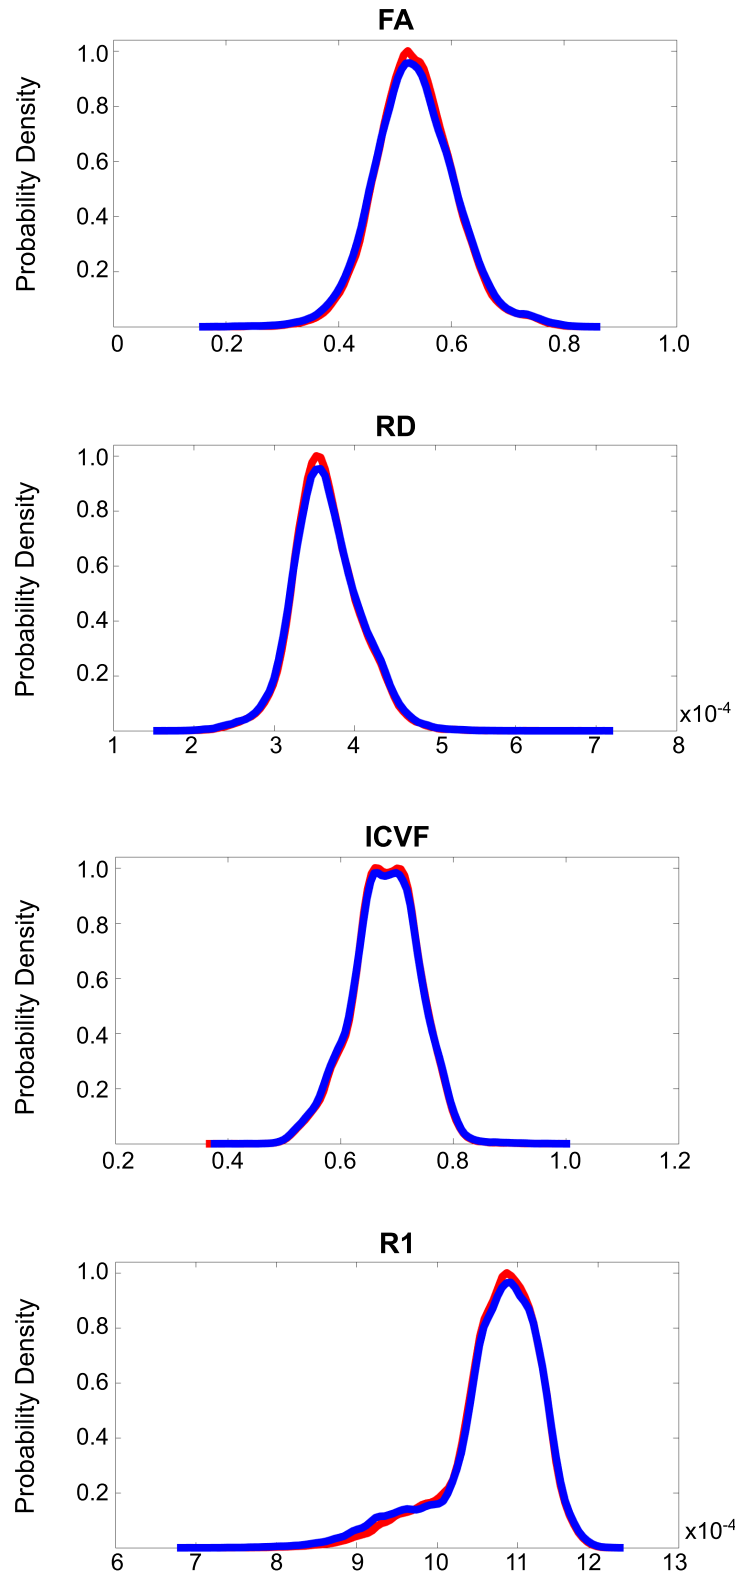

223 **Figure S10.** Pooled Subject-Level Edge Weight Distributions. Original (simple mean; red) and  
 224 COMMIT-weighted (weighted average; blue) methods of tractometry edge weight computation are  
 225 compared across SC networks weighted by FA, ICVF, RD and R<sub>1</sub>. Data from only four subjects is shown.  
 226

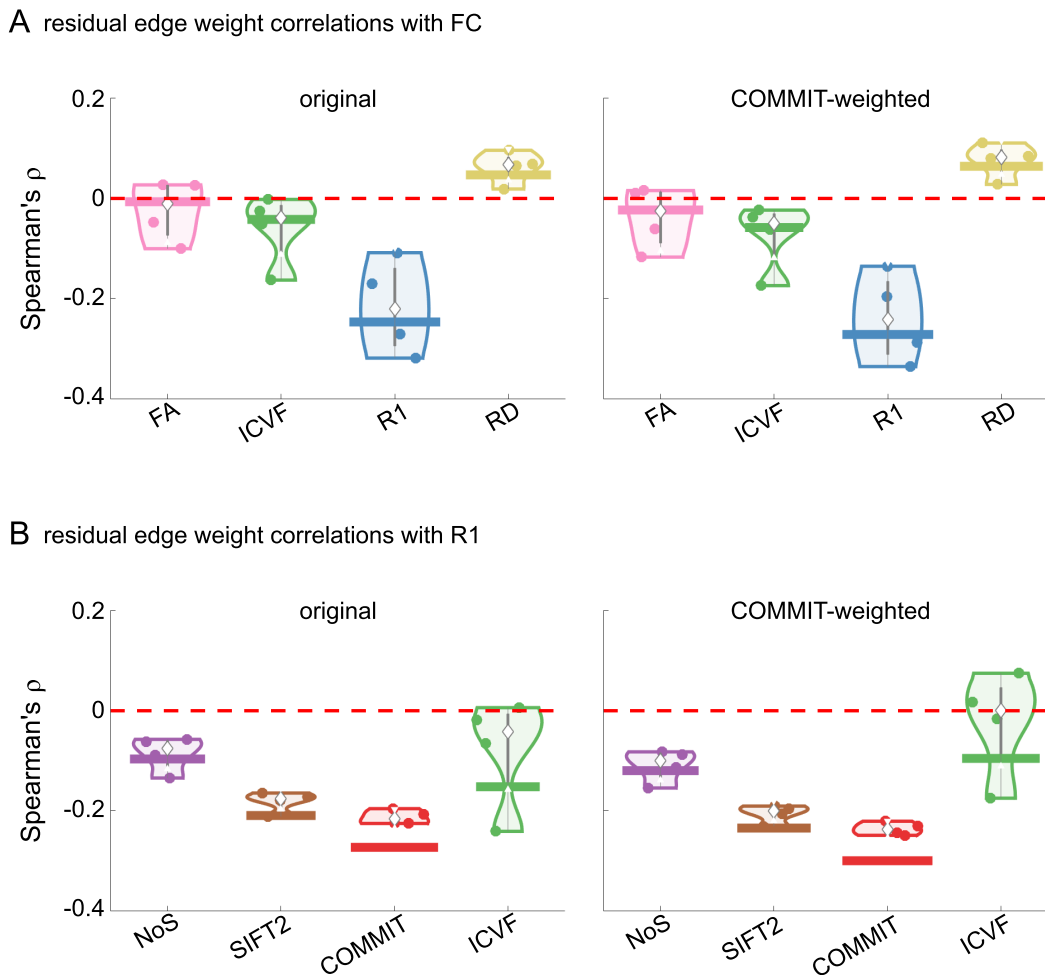

227  
 228 **Figure S11.** Residual Edge Weight Correlations with FC and R<sub>1</sub>. Edgewise Spearman's rank correlations  
 229 were computed with FC (top) and R<sub>1</sub> (bottom) for networks derived using original (left) and COMMIT-  
 230 weighted (right) tractometry methods. Variance due to edge length was controlled for in all networks  
 231 using linear regression. Colored data points and colored bars correspond to subject-level and group-  
 232 level correlation coefficients, respectively. Data from only four subjects is shown.  
 233

A normalized small-worldness

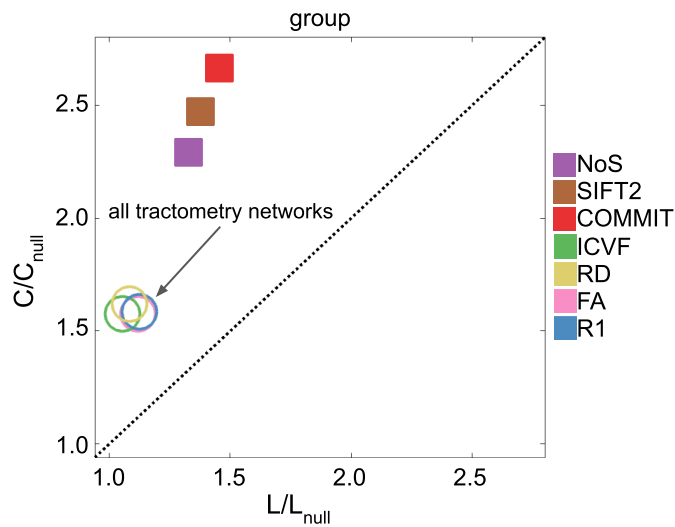

B normalized rich club

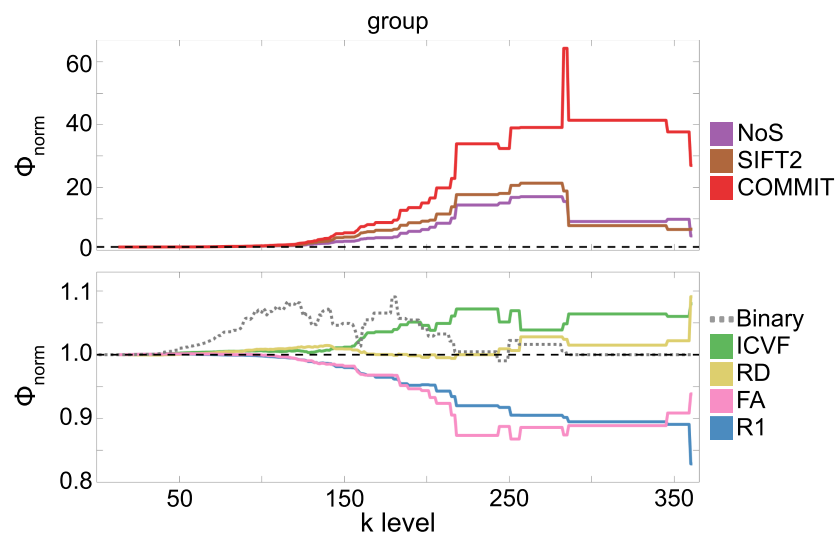

234

235 **Figure S12.** Network Topology of COMMIT-Weighted Tractometry Networks. Normalized small  
 236 worldness (A) and normalized rich club (B) are shown. The edge weights in tractometry networks  
 237 correspond to the COMMIT-weighted average tractometry method. The normalization of all topology  
 238 measures was carried out as in the main manuscript. Data from only four subjects is shown.

239

240

241 ***Our  $R_1$  Network is Comparable to Boshkovski et al. (2021)***

242 To assess the comparability of our  $R_1$ -weighted SC network to that presented in Boshkovski et  
243 al. 2021, we replicated Figure 1 from their publication, which illustrates the edgewise  
244 relationship between both NoS and FA with  $R_1$  (**Figure S13**). In an attempt to align our data  
245 more closely with theirs, we performed this analysis in the Schaefer-200 parcellation using only  
246 cortical nodes, and we did not control for edge length using linear regression.  
247

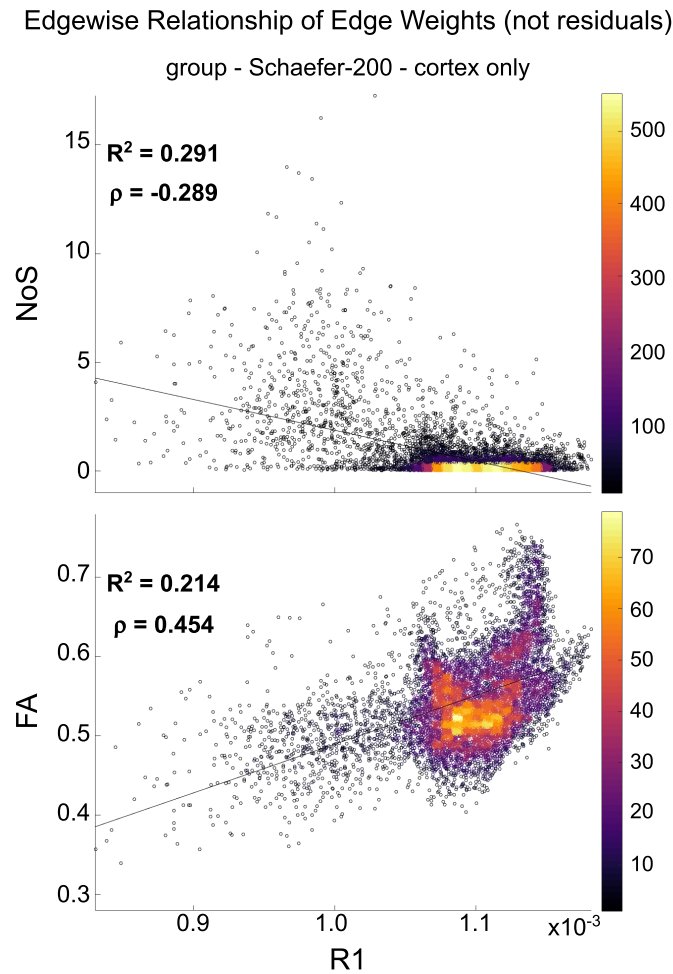

248

249 ***Figure S13. Edgewise Relationship of NoS and FA with  $R_1$  Without Controlling for Edge Length.***

250

251 Here, NoS shows a negative correlation with  $R_1$  reflected in both the negative slope of the best fit  
252 linear curve and the negative Spearman's rank correlation coefficient similar to the result we  
253 report in the main text. The magnitude of this correlation is inflated with respect to the values we  
254 report in the main text. However, that is to be expected, as we have already shown that NoS and  
255  $R_1$  have opposite relationships with edge length, and we did not control for this variance here.  
256 The coefficient of determination ( $R^2 = 0.291$ ) suggests that NoS and  $R_1$  share a portion of their  
257 variance. This contrasts with the result reported in Boshkovski et al. ( $R^2 = 0.023$ ). This may be  
258 due to that fact that our computation of NoS networks included a step in which edge weights  
259 were scaled by the inverse of the volume of their interconnecting nodes. This normalization was  
260 not performed by Boshkovski et al.

261

262 For this reason, the relationship with FA is likely to provide a better basis of comparison  
263 between our  $R_1$  networks. The edgewise relationship between FA and  $R_1$  we report here appears  
264 quite similar to the result reported in Boshkovski et al. Both scatter plots (ours and theirs)  
265 suggest a positive correlation and a similar amount of shared variance between FA and  $R_1$ .  
266 Overall, our  $R_1$  network shows a similar distribution of edge values and relationship with FA to  
267 the network reported in Boshkovski et al. Fundamental differences in our NoS networks limit  
268 comparability.

269
